# Supplementary material
Source: PubMed Central journal article supplement (PMC10074149)
Supplement: mmc1.pdf [file mmc1.pdf]

**Supplemental information**

**Excess of guide RNA reduces  
knockin efficiency and drastically  
increases on-target large deletions**

**Vanessa Chenouard, Isabelle Leray, Laurent Tesson, Severine Remy, Alasdair Allan, Daniel Archer, Adam Caulder, Agnès Fortun, Karine Bernardeau, Yacine Cherifi, Lydia Teboul, Laurent David, and Ignacio Anegon**

**2 $\mu$ M ssODN**

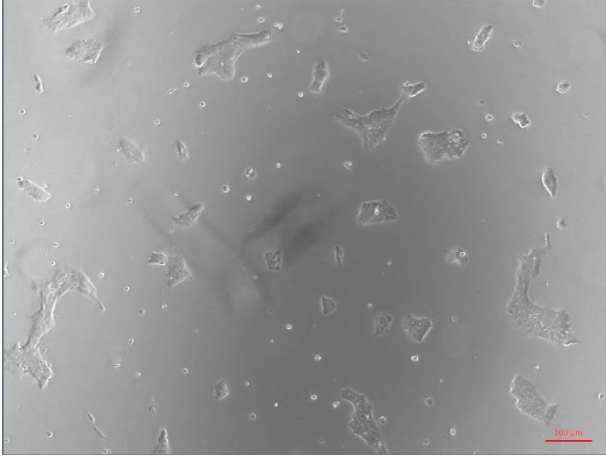

**3 $\mu$ M ssODN**

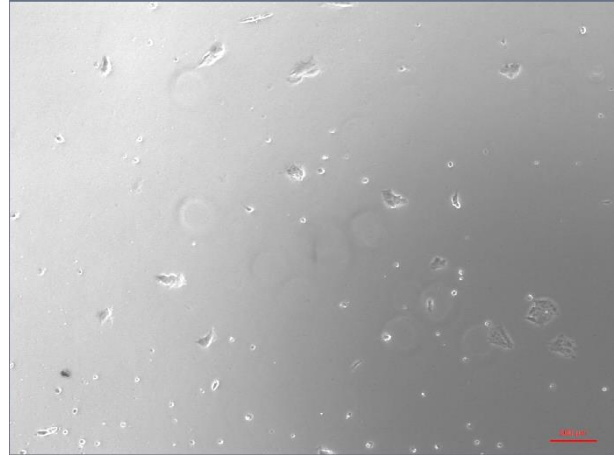

**2 $\mu$ M ssODN**

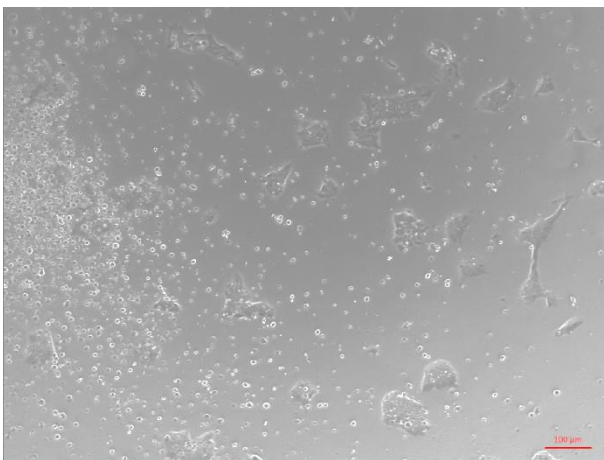

**4 $\mu$ M ssODN**

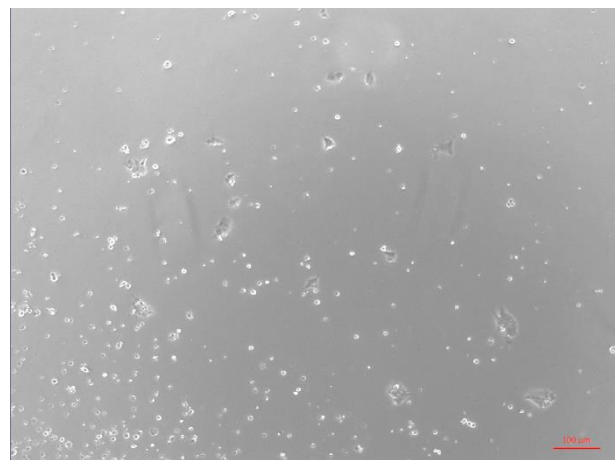

**Figure S1: Microscopic observation with Zeiss Axio vert.A1 microscope (5X) of hiPSC 2 days post-electroporation with Cas9 0.4 $\mu$ M, RNP ratio Cas9/dgRNA 1/1 and 2, 3 or 4 $\mu$ M of ssODN, related to Figure 2. Electroporation of 3 $\mu$ M and 4 $\mu$ M of ssODN with Cas9 0.4 $\mu$ M and RNP ratio 1/1 shows low confluences (10% and 5% respectively compared to their 2 $\mu$ M control (25% and 20%, respectively). Moreover, with 2 $\mu$ M of ssODN, hiPSC form numerous colonies compared to higher concentrations. A 100  $\mu$ m scale bar is displayed in red on each picture. dgRNA, dual guide RNA; ssODN, single-stranded oligonucleotide, hiPSC, human induced pluripotent stem cells.**

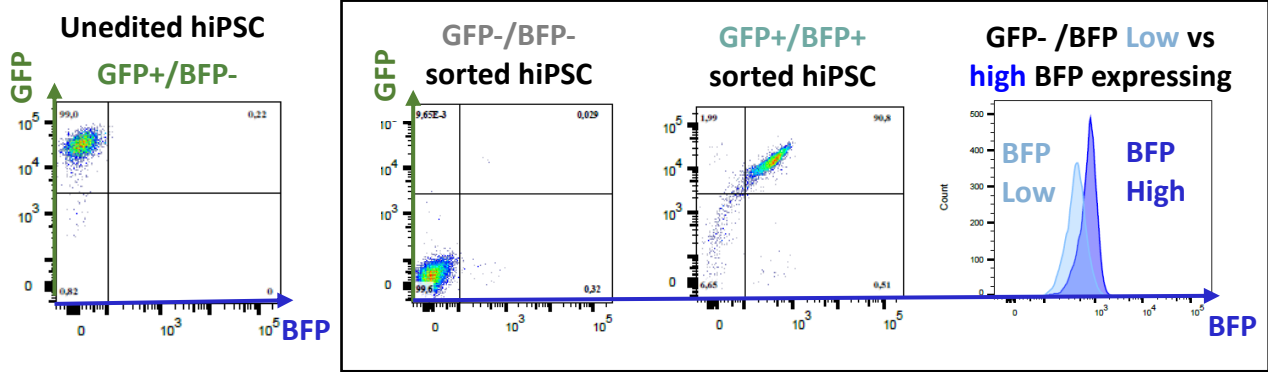

**Figure S2: Cell-sorted subsets phenotyping by flow cytometry to verify purity of each subset, related to Figure 3.** Cell sorting results of GFP- /BFP-, GFP+/BFP+, GFP-/BFP low and GFP-/BFP high subsets. hiPSC, human induced pluripotent stem cells; GFP, Green Fluorescent Protein; BFP, Blue Fluorescent Protein.

**A.**

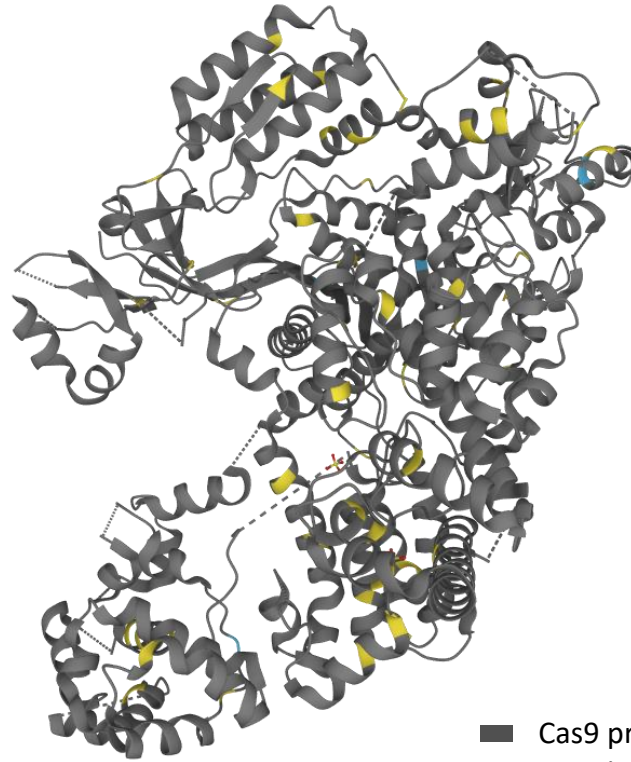

■ Cas9 protein  
■ Tyrosine residues  
■ Tryptophan residues  
■ guide RNA

**B.**

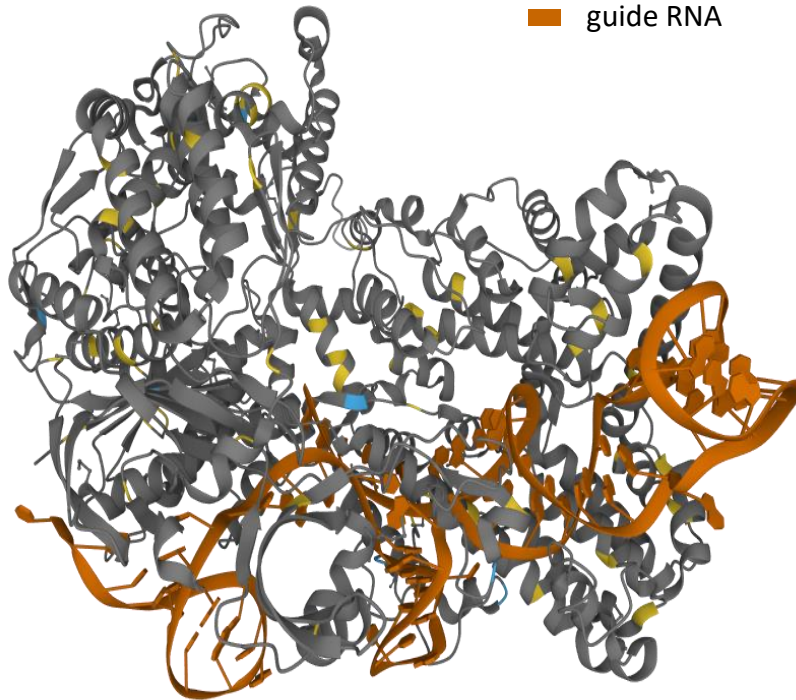

**Figure S3: Tyrosine and tryptophan residues visualization on Cas9 from *Streptococcus Pyogenes* and RNP complex, related to Figure 5. A.** ApoCas9 conformation (PDB: 4CMP) or **B.** in complex with a gRNA (orange) forming the RNP complex conformation (PDB: 4ZT0). Tyrosine (yellow) and tryptophan (blue) residues visualization. Figure made with PDB visualization online software. PDB, protein data base; dgRNA, dual guide RNA.

**Table S2. CRISPR/Cas9 mediated edition and KI generation on rat embryos with dgRNA rEphx2 and ssODN XbaI, related to Figure 6.**

No., number; ssODN, single-stranded oligonucleotide; KI, knockin.

| <b>Cas9<br/>(<math>\mu</math>M)</b> | <b>Cas9/dgRNA<br/>molar ratio</b> | <b>ssODN<br/>(<math>\mu</math>M)</b> | <b>No. of<br/>electroporation<br/>experiments</b> | <b>No. of foster<br/>females used</b> | <b>No. of analyzed<br/>/No. of<br/>transferred<br/>embryos (%)</b> | <b>No. edited<br/>embryos,<br/>including KI<br/>/No. of<br/>analyzed<br/>embryos (%)</b> | <b>No. KI<br/>embryos<br/>/No. edited<br/>embryos,<br/>including KI<br/>(%)</b> | <b>No. of embryos<br/>with large<br/>deletion<br/>/No. KI<br/>embryos/ (%)</b> |
|-------------------------------------|-----------------------------------|--------------------------------------|---------------------------------------------------|---------------------------------------|--------------------------------------------------------------------|------------------------------------------------------------------------------------------|---------------------------------------------------------------------------------|--------------------------------------------------------------------------------|
| 0.2                                 | 1/1                               | 2                                    | 3                                                 | 4                                     | 30 / 108 (27.8%)                                                   | 29 (96.7%)                                                                               | 15 (50.0%)                                                                      | 5 (16.7%)                                                                      |
| 0.2                                 | 1/2                               | 2                                    | 3                                                 | 3                                     | 24 / 88 (27.3%)                                                    | 24 (100%)                                                                                | 9 (37.5%)                                                                       | 18 (75.0%)                                                                     |
